# Supplementary material
Source: MDPI journal article supplement (https://www.mdpi.com/2624-8549/5/1/25)
Supplement: s1 [file s1 › chemistry-2199924-supplementary.pdf]

# Environmental applications of zeolites: hydrophobic Sn-BEA as a selective gas sensor for exhaust fumes

Martin Jendrlin,<sup>b\*</sup> Julien Grand,<sup>a</sup> Louwanda Lakiss,<sup>a</sup> Florent Dubray,<sup>a</sup> Philippe Bazin,<sup>a</sup> Jaafar El Fallah,<sup>a</sup> Svetlana Mintova,<sup>a</sup> Vladimir Zholobenko<sup>b</sup>

<sup>a</sup> Normandie Univ, ENSICAEN, CNRS, Laboratoire Catalyse et Spectrochimie, 6 Bd Maréchal Juin, 14000 Caen, France

<sup>b</sup> School of Chemical and Physical Sciences, Keele University, Keele, ST55BG, United Kingdom

\*Corresponding author, m.jendrlin@keele.ac.uk

## Supplementary information

### S1. Sample characterisation

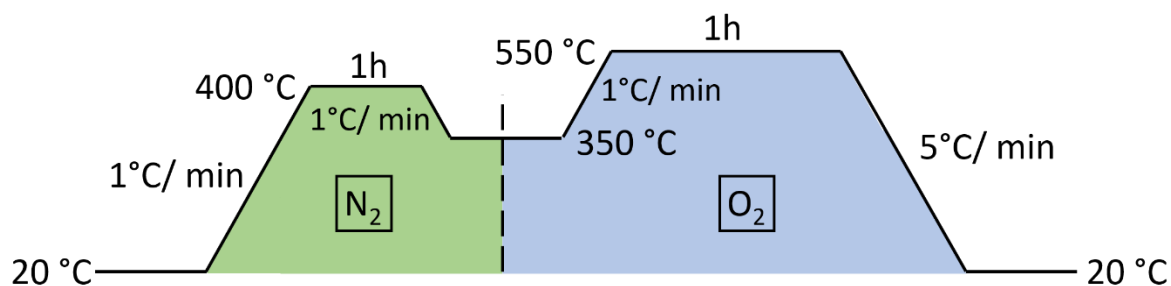

Figure S1. Sn-BEA calcination scheme.

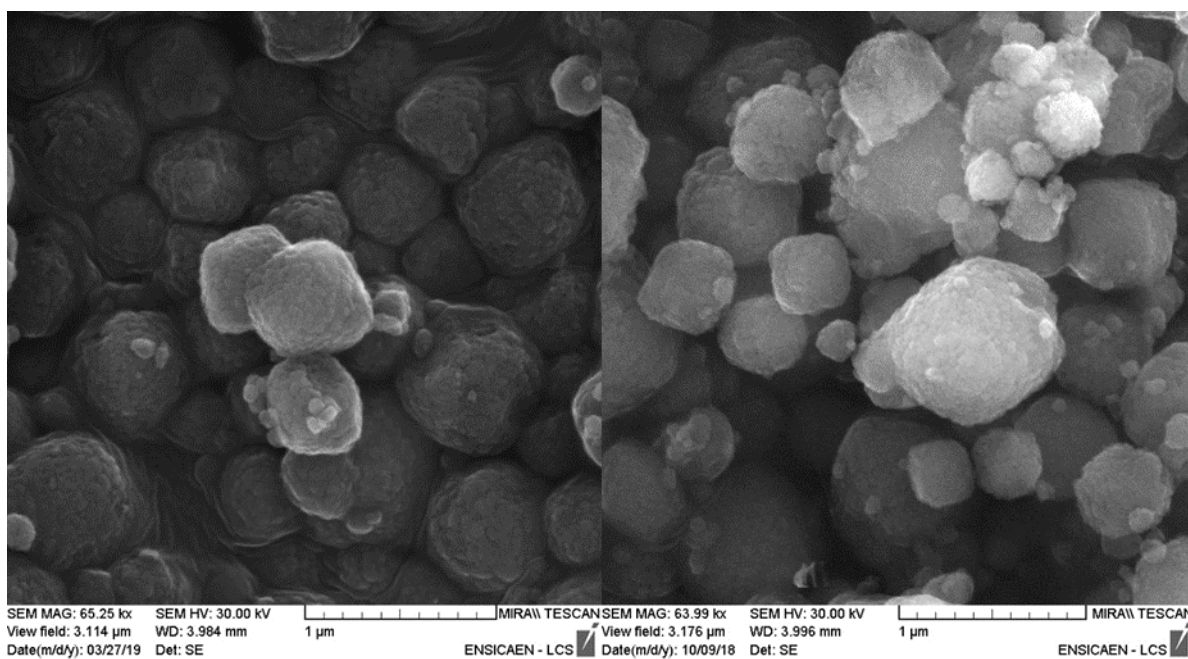

Figure S2. SEM micrographs of BEA (left) and DeAl-BEA (right) zeolites.

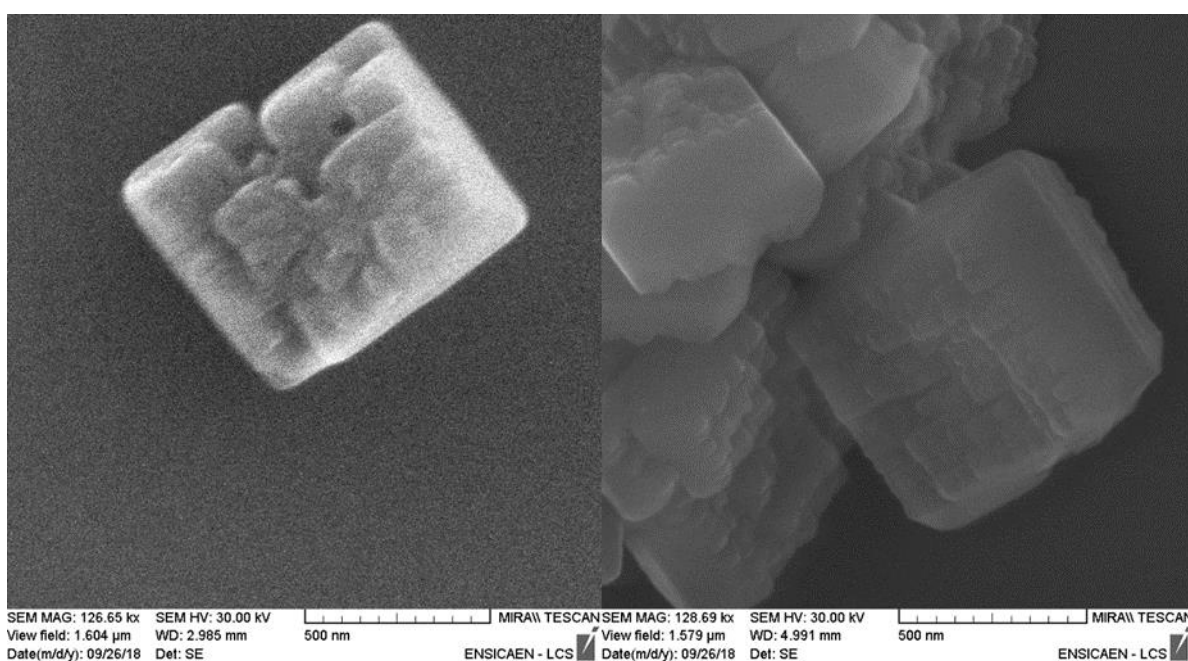

Figure S3. SEM micrographs of Sn-BEA zeolite.

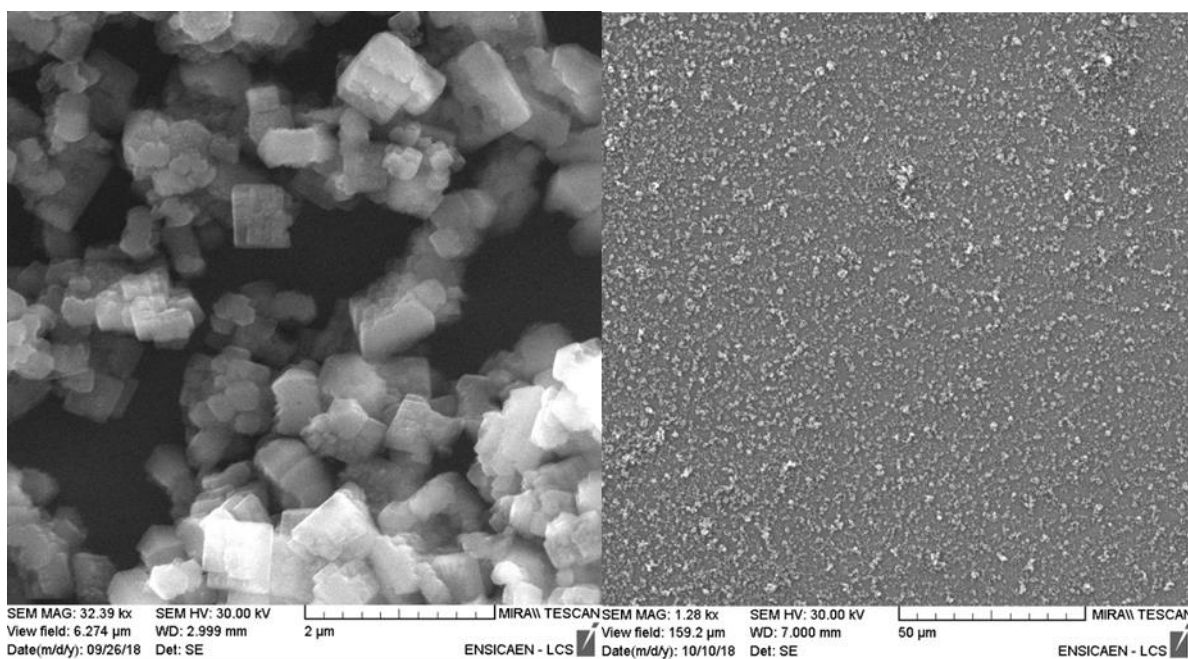

Figure S4. SEM micrographs of Sn-BEA powder (left) and Sn-BEA deposited on a silicon wafer (right).

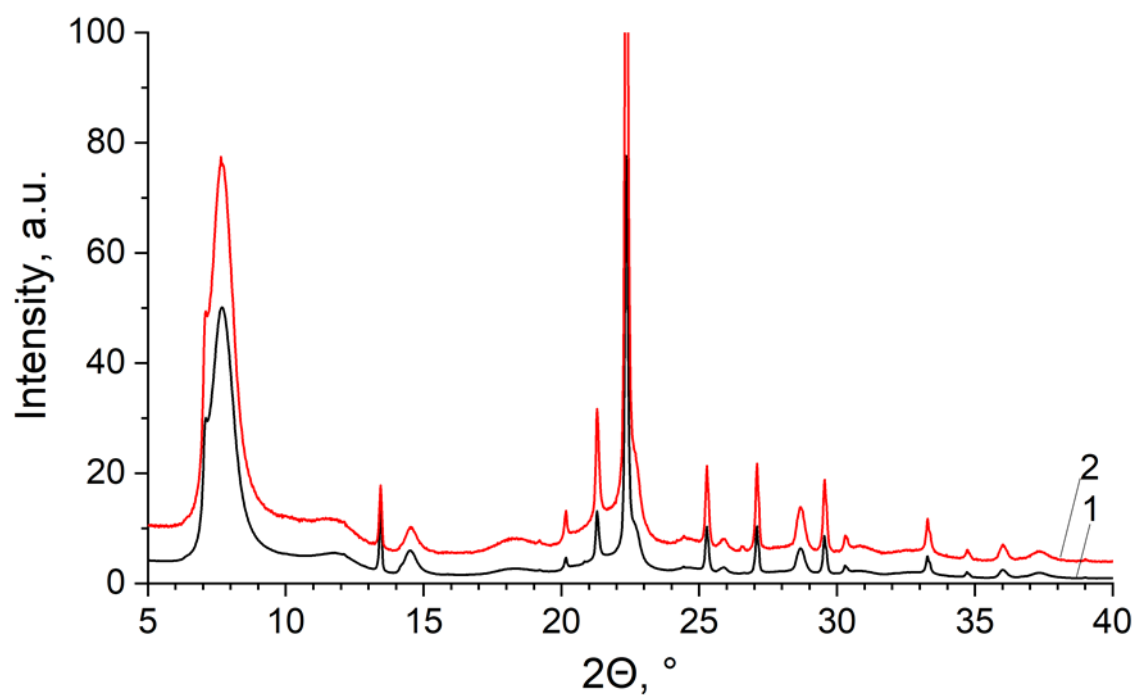

Figure S5. XRD patterns of Sn-BEA freshly prepared (1), Sn-BEA zeolites after 9 months (2).

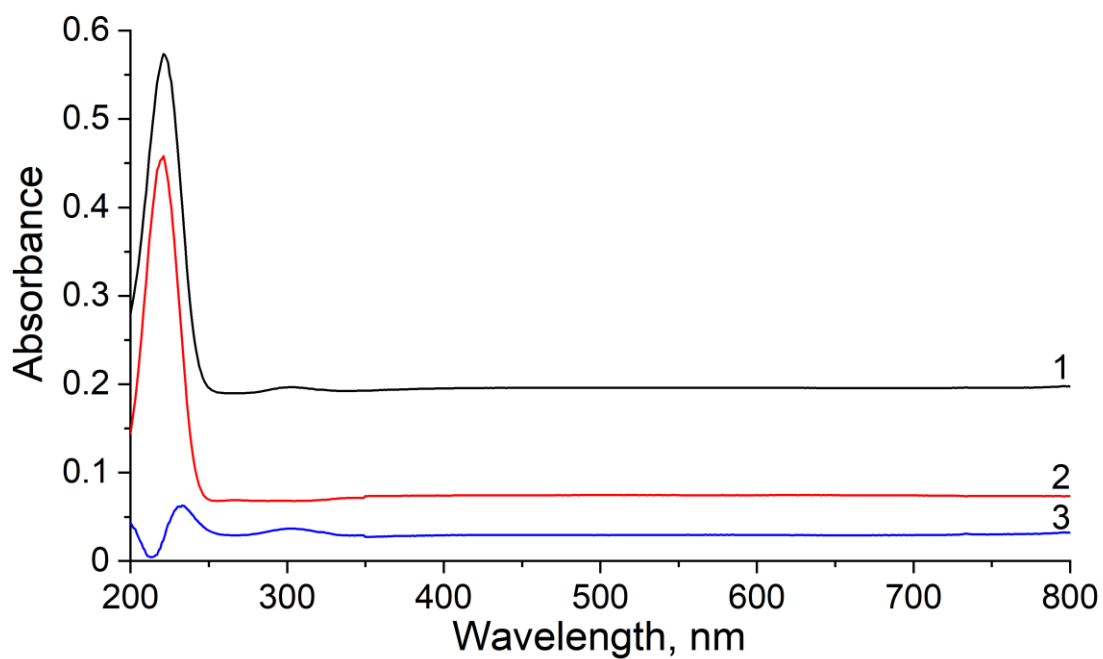

Figure S6. DRUV-VIS spectra of Sn-BEA(1) and DeAl-BEA (2) zeolites,  
(1)-(2) difference spectrum (3).

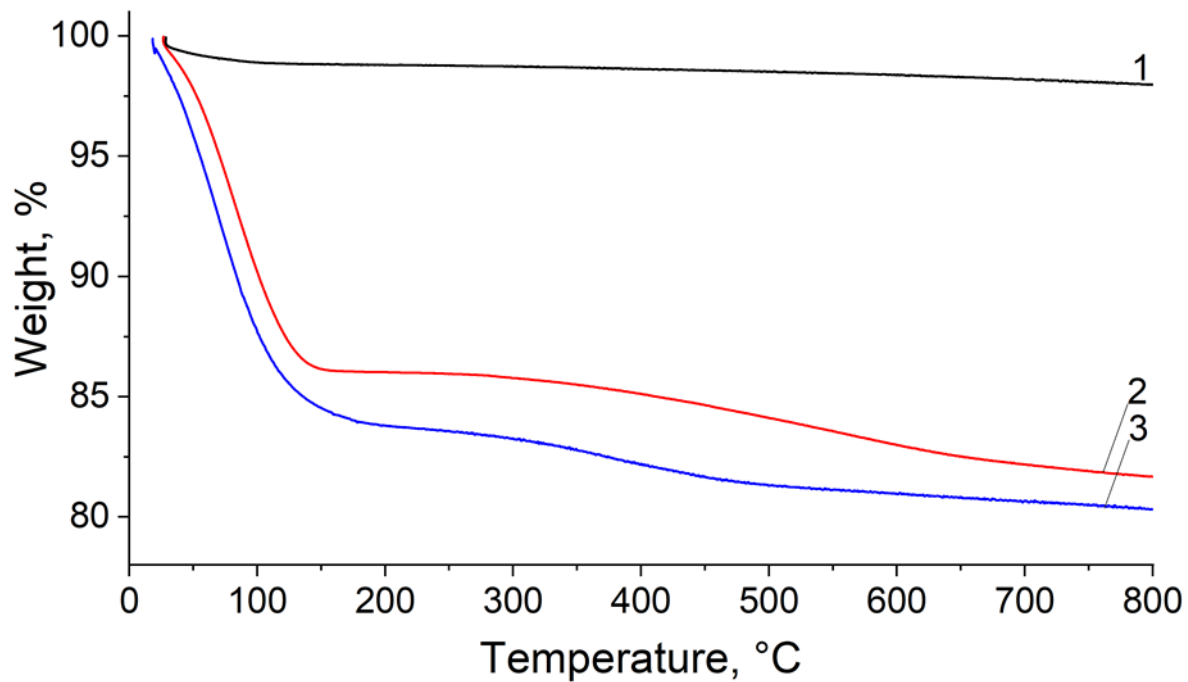

Figure S7. TG curves of Sn-BEA (1), DeAl-BEA (2) and BEA (3) zeolites.

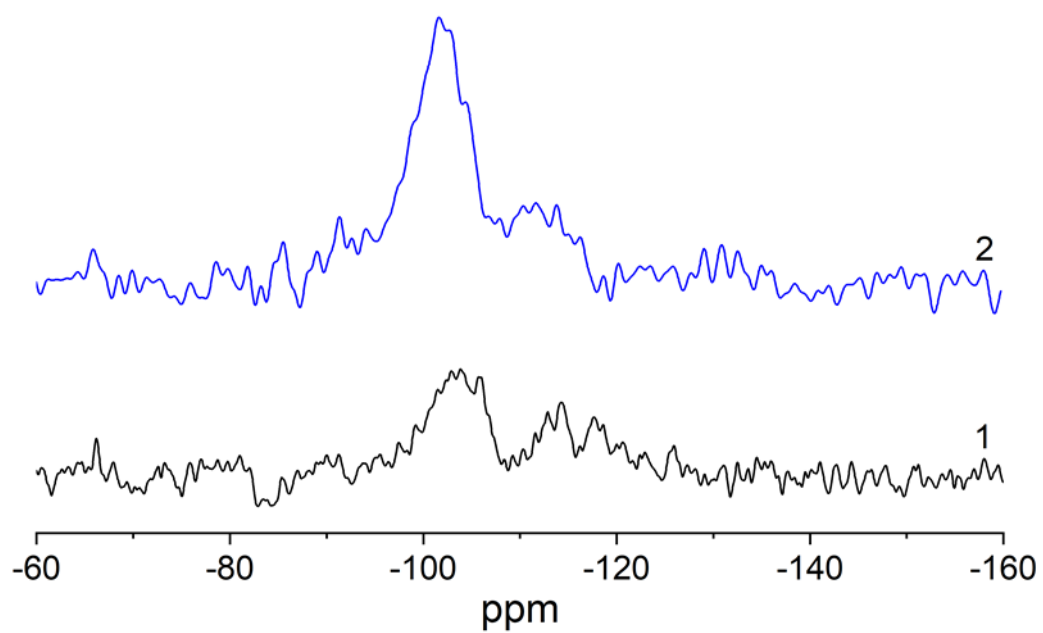

Figure S8.  $^{29}\text{Si}$ - $^1\text{H}$  CP MAS NMR spectra of Sn-BEA (1), and BEA (2) zeolites.

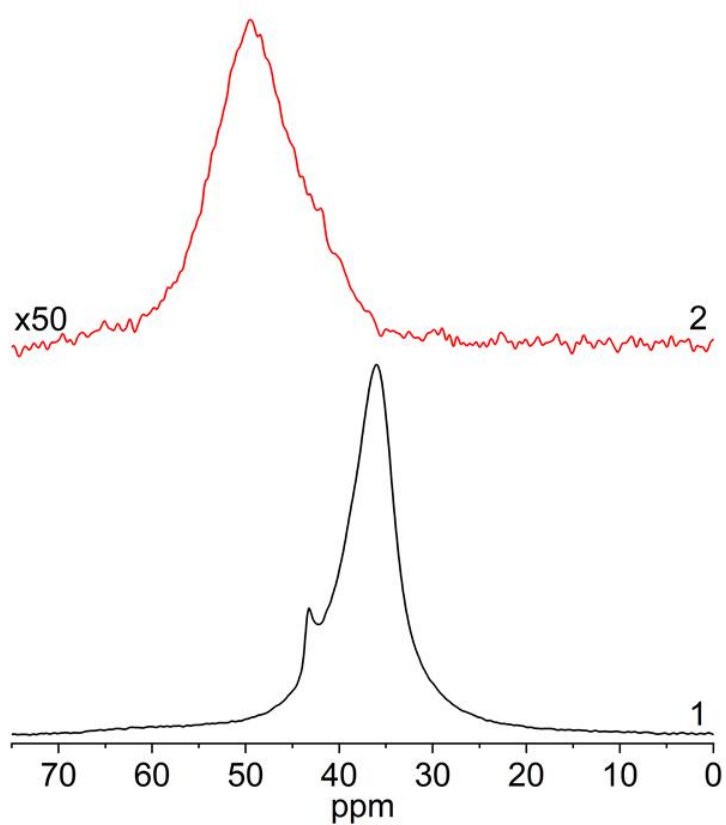

Figure S9.  $^{31}\text{P}$  MAS NMR spectra of TMPO adsorbed on Sn-BEA (1) and DeAl-BEA (2, intensity is multiplied by a factor of 50) zeolites.

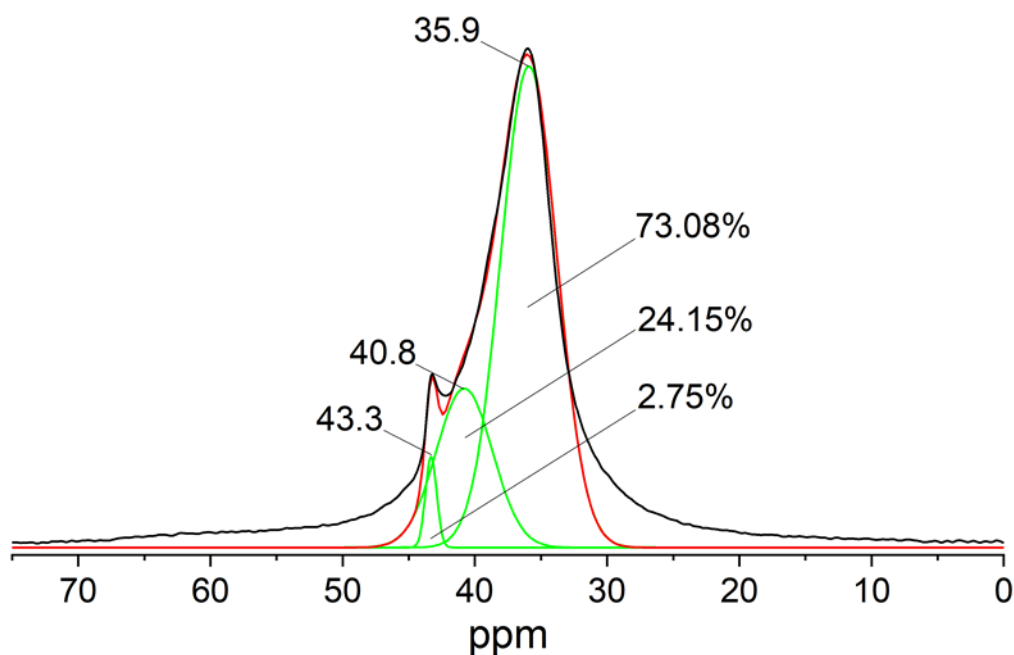

Figure **S10**. Deconvoluted  $^{31}\text{P}$  MAS NMR spectrum of TMPO adsorbed on Sn-BEA (black), fitted cumulative peak (red) and single fitted peaks (green).

There is some discussion in the literature regarding the interpretation of the  $^{31}\text{P}$  NMR spectra of TMPO adsorbed on zeolites. Indeed, according to [38,53] the peak around 43 ppm should be attributed to physisorbed TMPO. Lewis et al.,[38] who first reported characterisation of Sn-containing zeolites, stated that the physisorbed TMPO is represented by wide peaks (fwhm > 9 ppm) and the bound TMPO has narrow peaks (fwhm < 1.5 ppm). On the other hand, Dubray et al.[52] reported a different interpretation of adsorbed TMPO on Mo-containing MFI zeolites, describing the narrow peaks as physisorbed TMPO and the broad peaks as the molybdenum bound TMPO. Overall, the interpretation of TMPO spectra is not unambiguous.

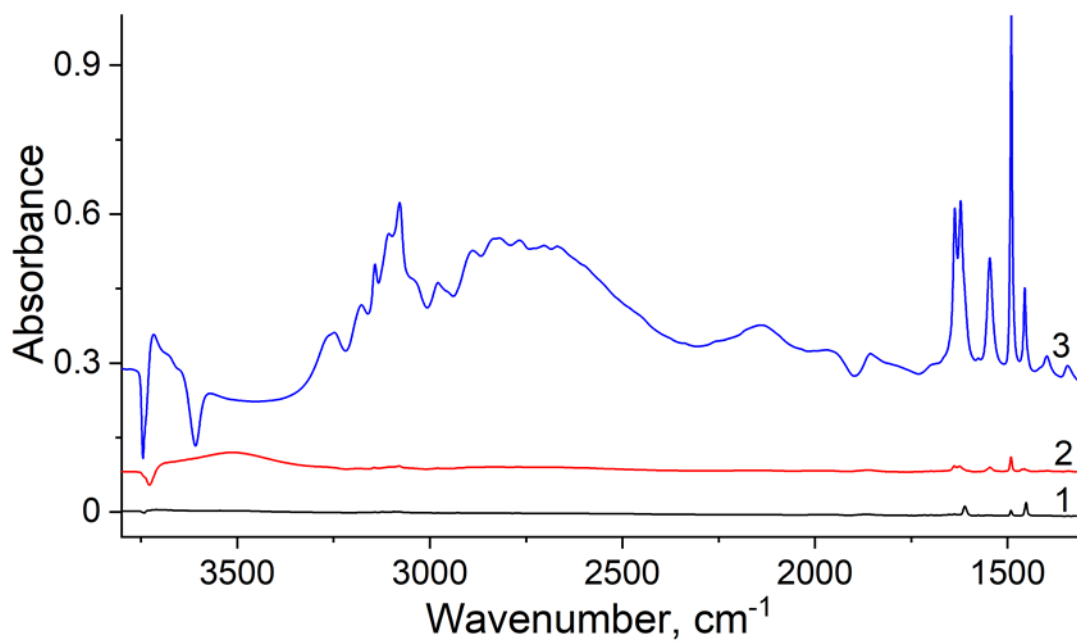

Figure **S11**. Difference FTIR spectra of Sn-BEA (1), DeAl-BEA (2) and BEA (3) following pyridine adsorption.

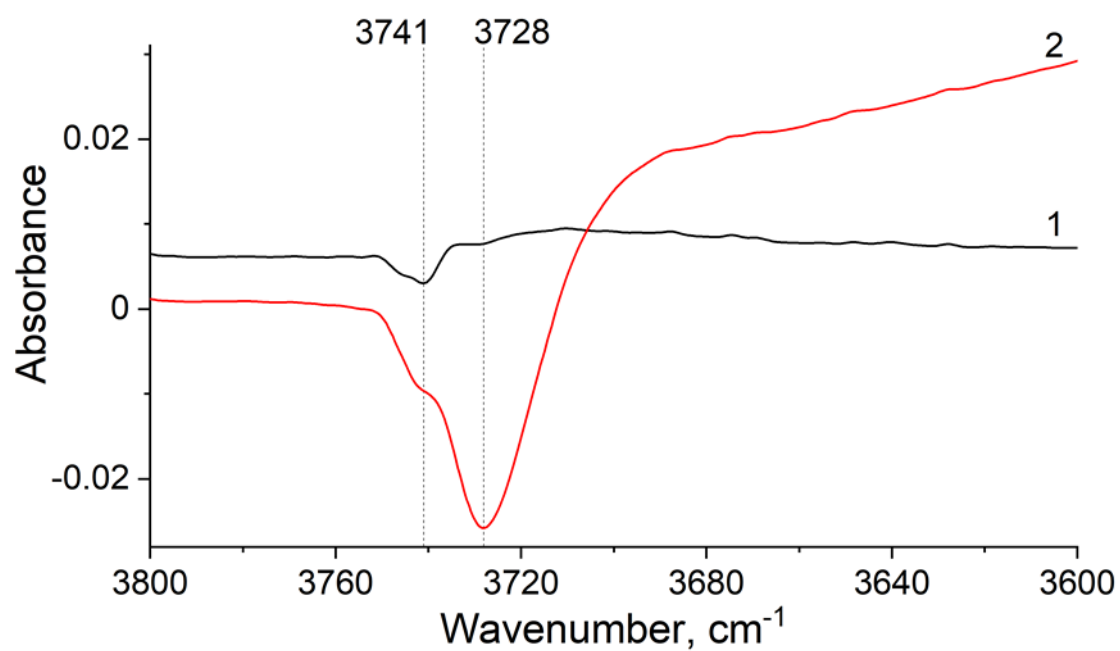

Figure **S12**. The OH-region of the difference FTIR spectra of Sn-BEA (1) and DeAl-BEA (2) zeolites following pyridine adsorption.

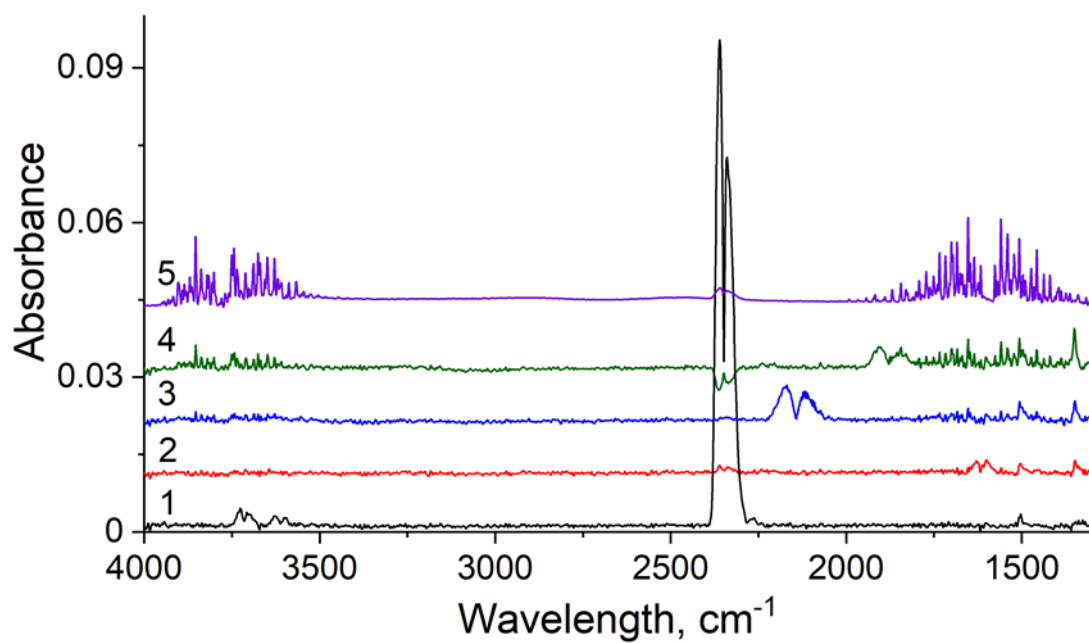

Figure S13. FTIR spectra of the selected exhaust gases, 5000 ppm of CO<sub>2</sub> (1), 1000 ppm of NO<sub>2</sub> (2), 5000 ppm of CO (3), 5000 ppm of NO (4), water vapour (5).

S2. FTIR difference spectra of CO, CO<sub>2</sub>, NO, NO<sub>2</sub> detected by Sn-BEA and DeAl-BEA

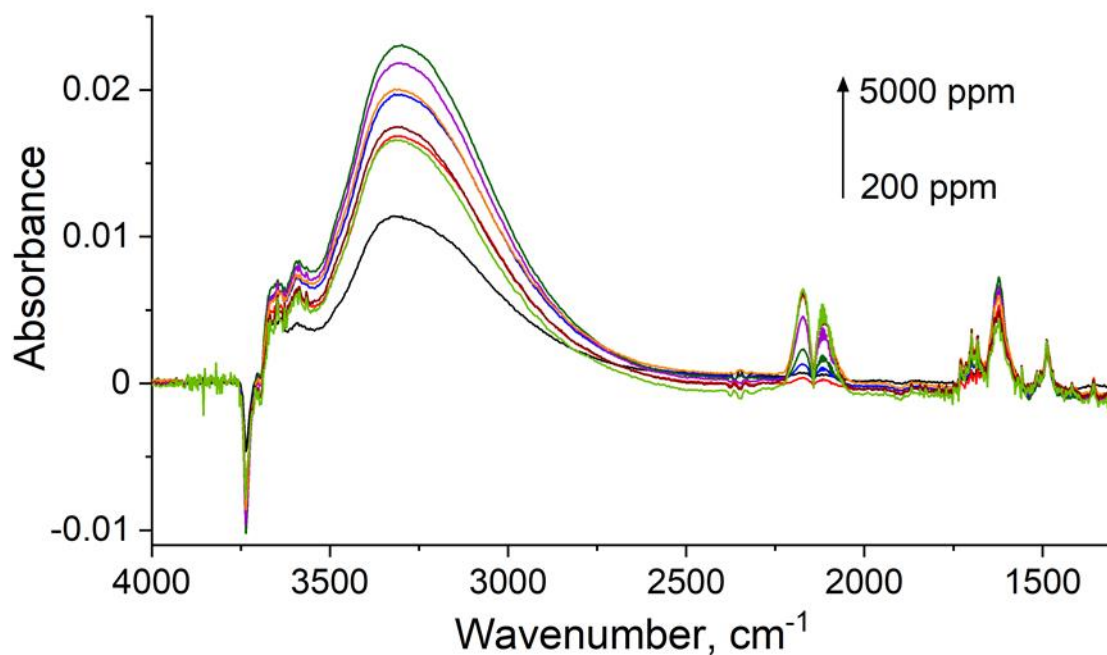

Figure S14. FTIR spectra of CO detected by Sn-BEA: 200 ppm (black), 400 ppm, 800 ppm, 1600 ppm, 3200 ppm, 4000 ppm, 4500 ppm, 5000 ppm.

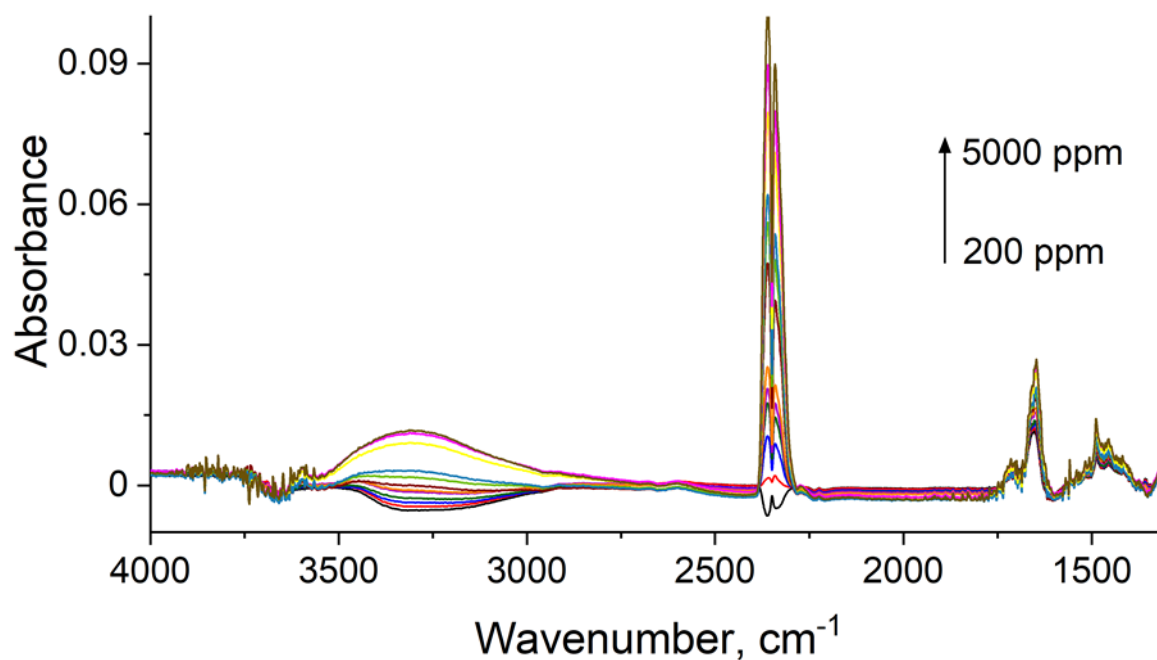

Figure S15. FTIR spectra of CO<sub>2</sub> detected by Sn-BEA: 200 ppm (black), 200-1000 ppm increments of 200 ppm, 1000-5000 ppm increments of 500 ppm.

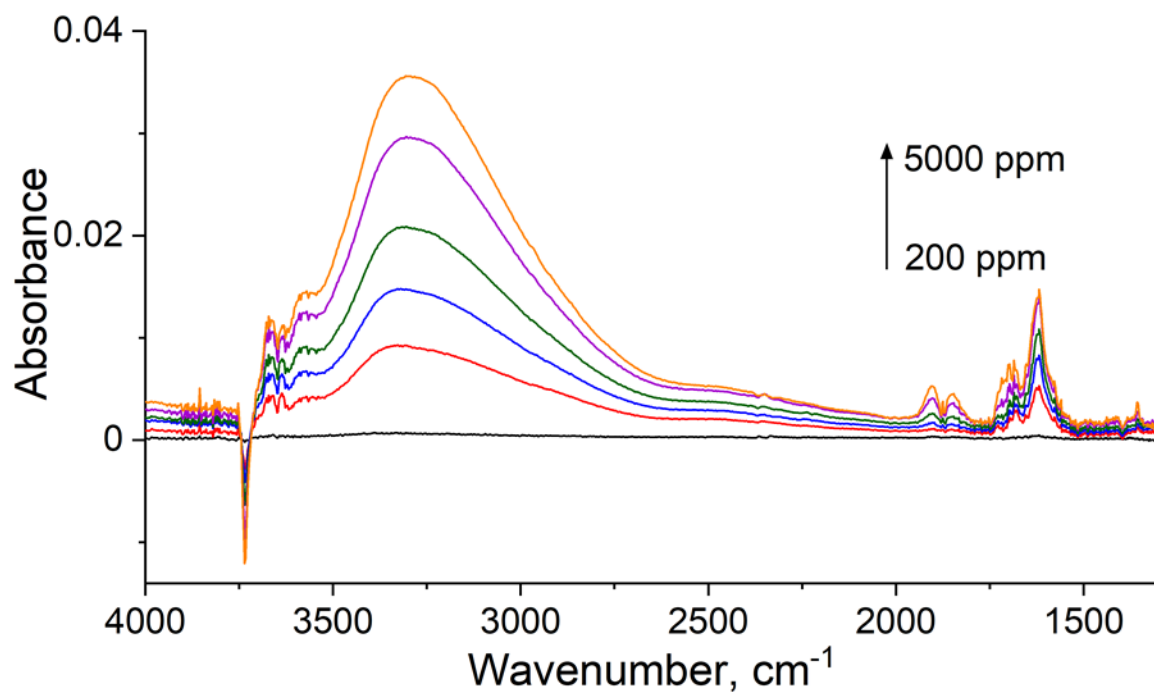

Figure **S16**. FTIR spectra of NO detected by Sn-BEA: 200 ppm (black), 400 ppm, 800 ppm, 1600 ppm, 3200 ppm, 5000 ppm.

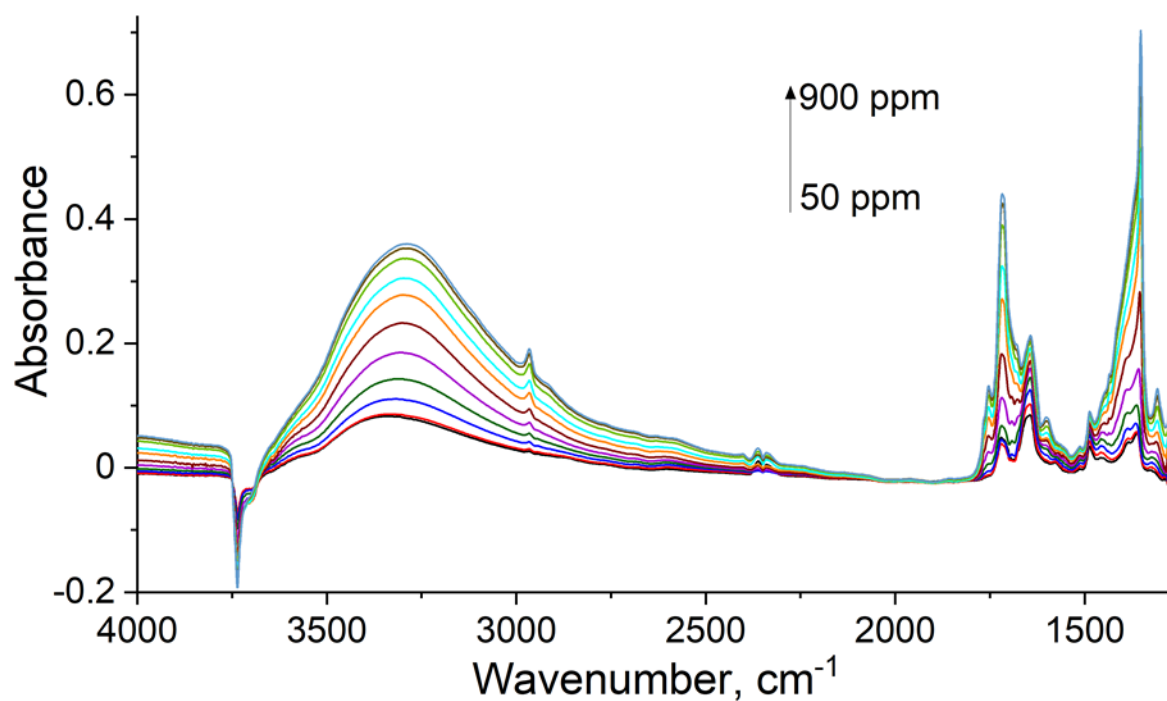

Figure **S17**. FTIR spectra of  $\text{NO}_2$  detected by Sn-BEA: 50 ppm (black), 100-900 ppm increments of 100 ppm.

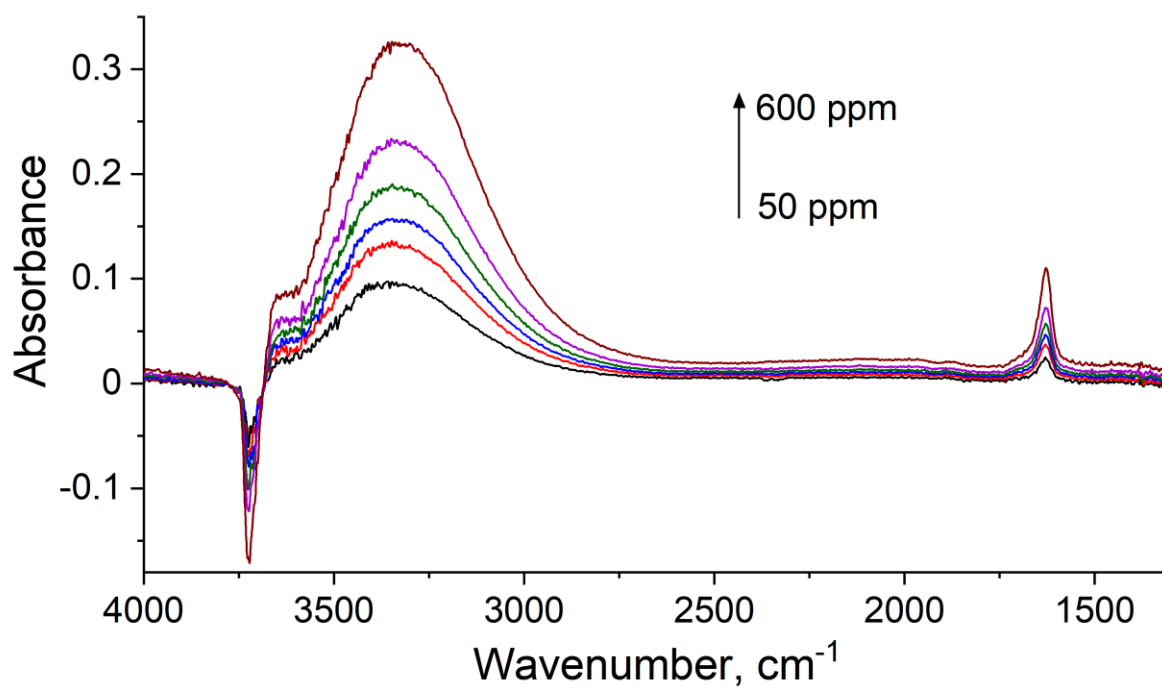

Figure **S18**. FTIR spectra of CO detected by DeAl-BEA: 50 ppm (black), 100 ppm, 200 ppm, 300 ppm, 400 ppm, 600 ppm.

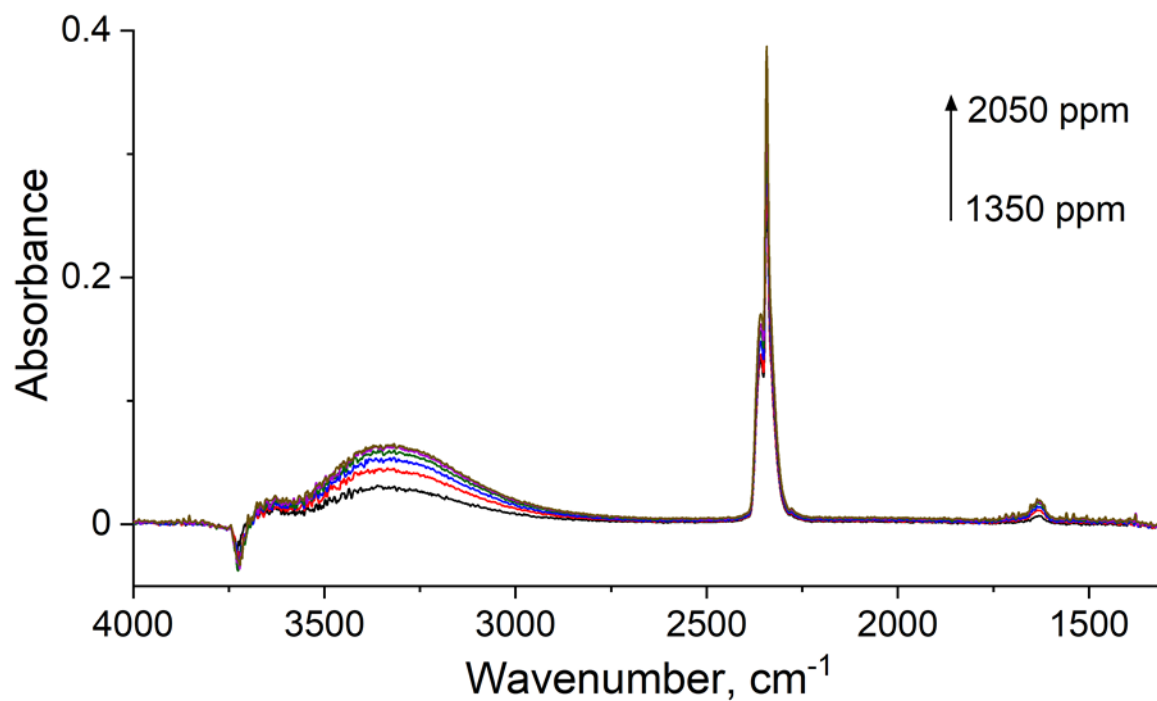

Figure **S19**. FTIR spectra of  $\text{CO}_2$  detected by DeAl-BEA: 1350 ppm (black), increments of 150 ppm.

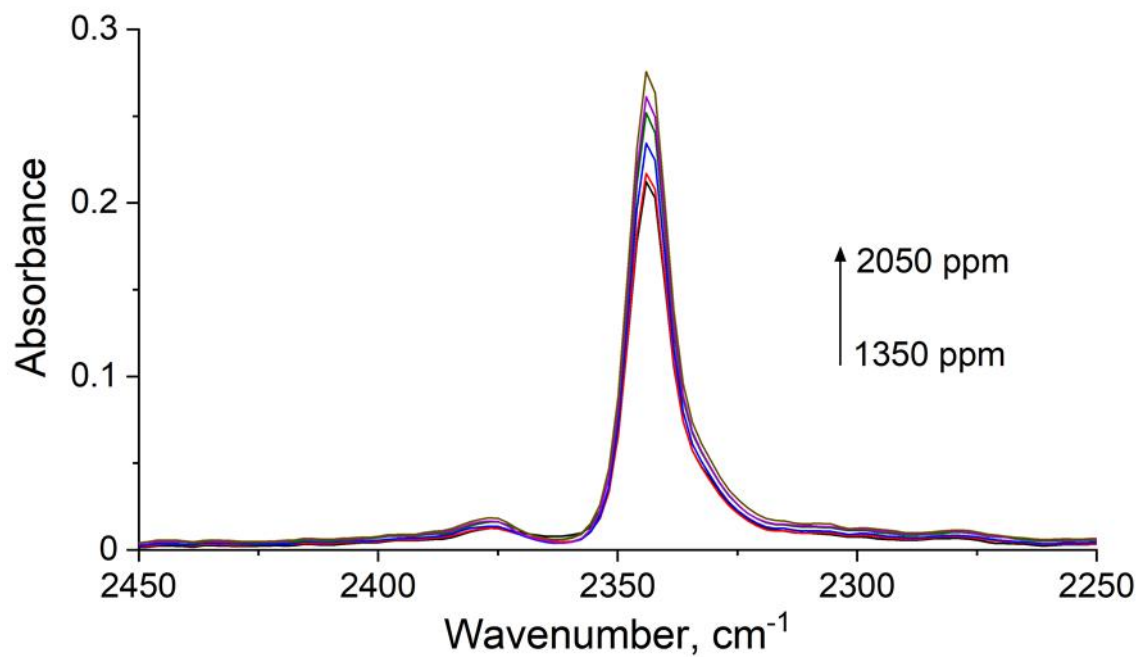

Figure S20. FTIR spectra of CO<sub>2</sub> detected by DeAl-BEA: zoomed in the 2450-2240 cm<sup>-1</sup> region, 1350 ppm (black), increments of 150 ppm, CO<sub>2</sub> gas phase spectrum subtracted.

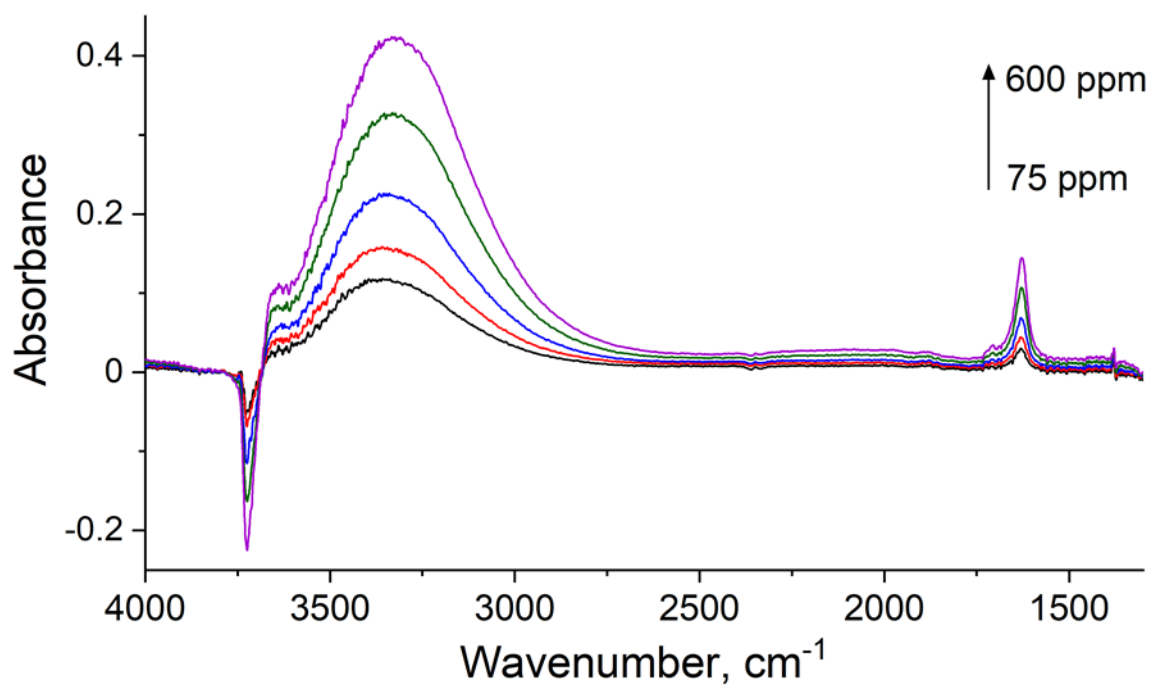

Figure S21. FTIR spectra NO detected by DeAl-BEA: 75 ppm (black), 100 ppm, 200 ppm, 400 ppm, 600 ppm.

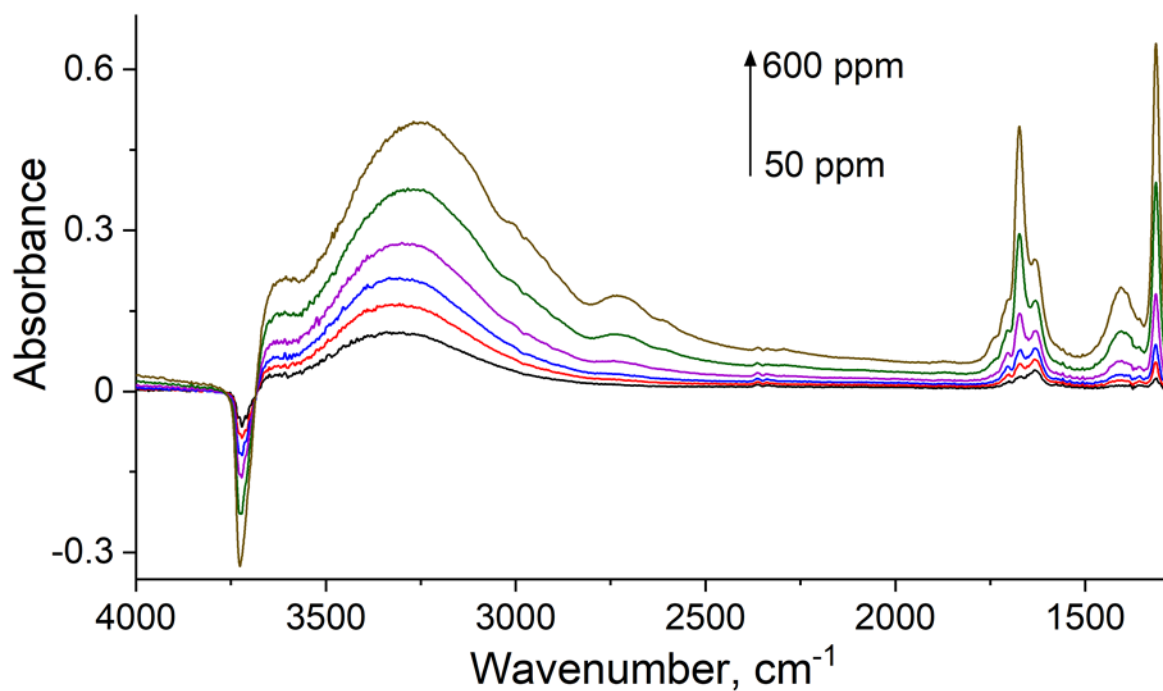

Figure S22. FTIR spectra of NO<sub>2</sub> detected by DeAl-BEA: 50 ppm (black), 75 ppm, 100 ppm, 200 ppm, 400 ppm, 600 ppm.

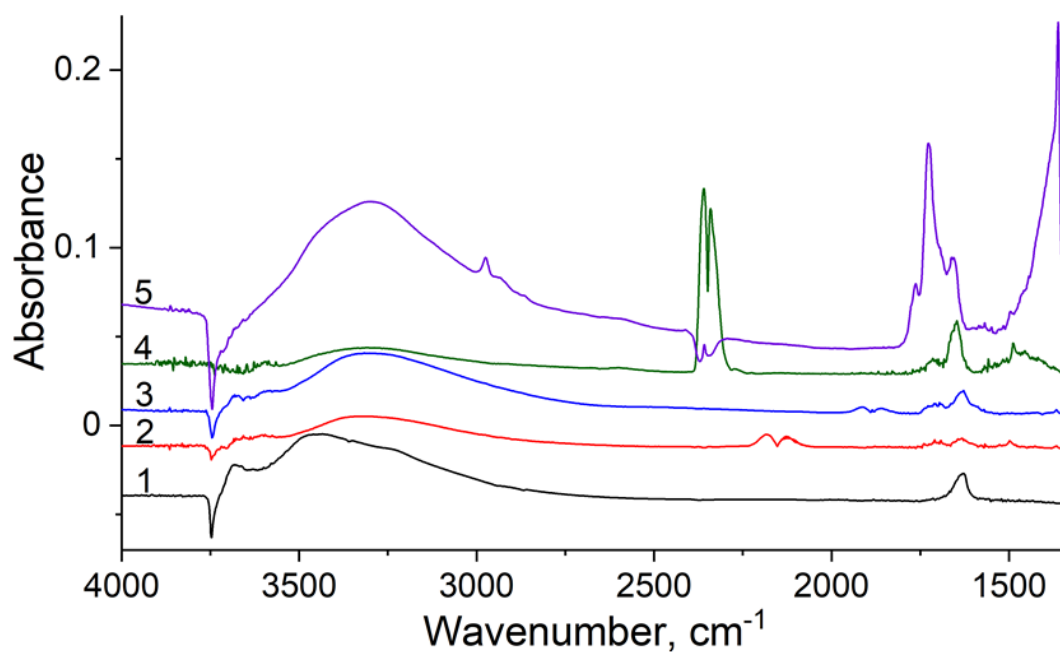

Figure S23. FTIR spectra of 5000 ppm of H<sub>2</sub>O (1), 5000 ppm of CO (2), 5000 ppm of NO (3), 5000 ppm of CO<sub>2</sub> (4) and 900 ppm of NO<sub>2</sub> (5) adsorbed on Sn-BEA, all the spectra are offset and spectrum 1 is multiplied by a factor of 0.1 for clarity.

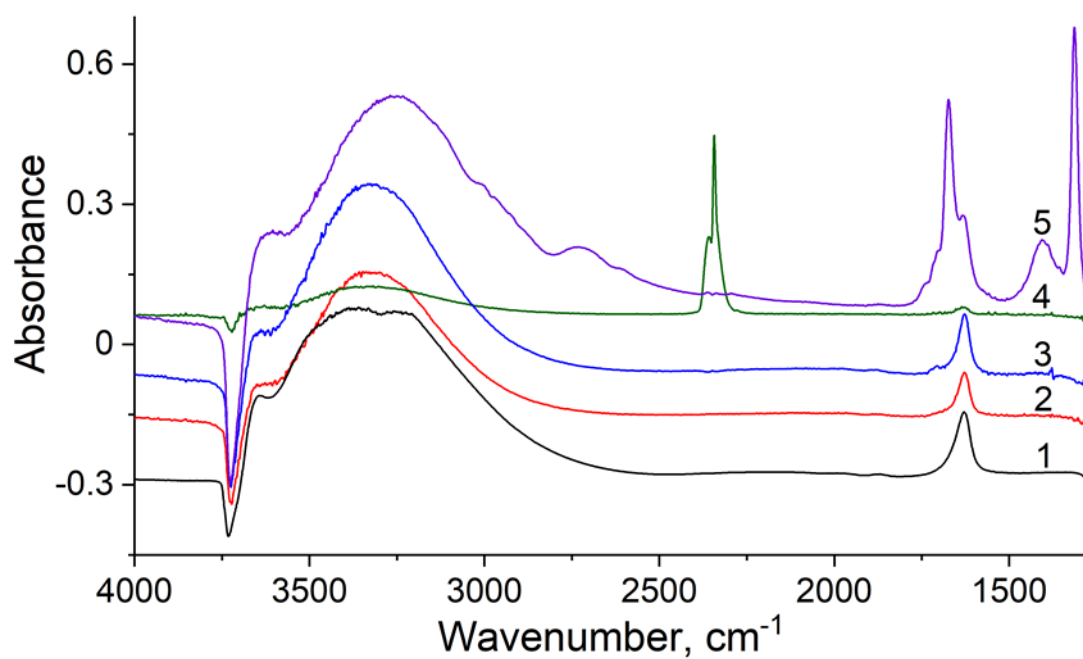

Figure S24. FTIR spectra of 5000 ppm of H<sub>2</sub>O (1), 600 ppm of CO (2), 600 ppm of NO (3), 2050 ppm of CO<sub>2</sub> (4) and 600 ppm of NO<sub>2</sub> (5) adsorbed on DeAl-BEA, all the spectra are offset and spectrum 1 is multiplied by a factor of 0.1 for clarity.

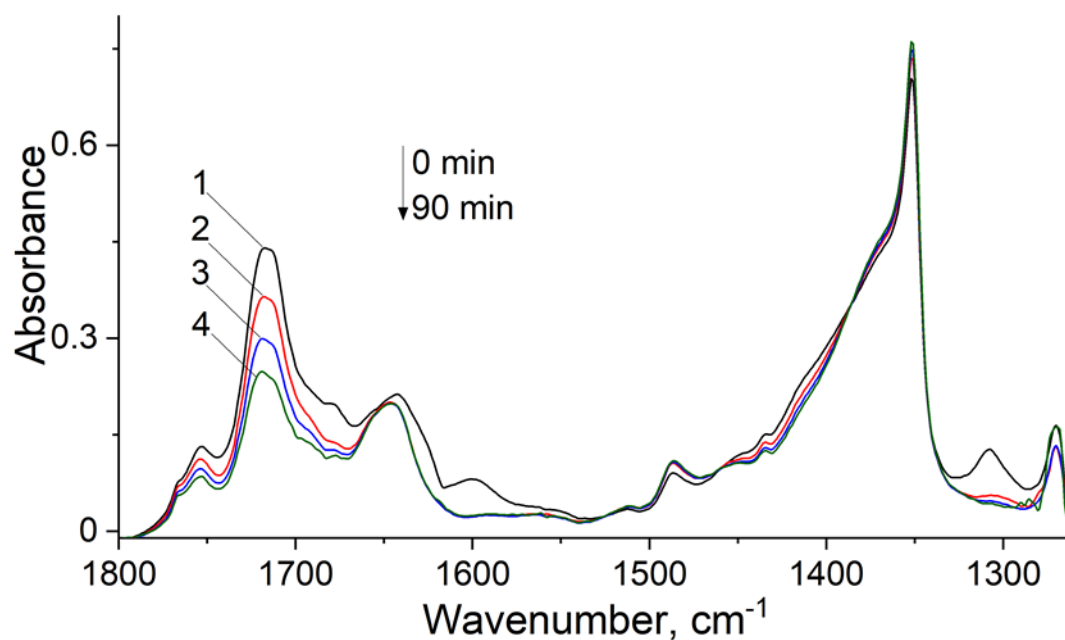

Figure S25. FTIR spectra of 900 ppm of NO<sub>2</sub> adsorbed on Sn-BEA (1), followed by desorption at room temperature for 30 min (2), 60 min (3) and 90 min (4).

## References

38. Lewis, J. D., Ha, M., Luo, H., Faucher, A., Michaelis, V. K., Román-Leshkov, Y. & Románromán-Leshkov, Y. Distinguishing Active Site Identity in Sn-Beta Zeolites Using  $^{31}\text{P}$  MAS NMR of Adsorbed Trimethylphosphine Oxide. *ACS Catal.* **8**, 3076–3086 (2018).
53. Zheng, A., Liu, S.-B. & Deng, F.  $^{31}\text{P}$  NMR Chemical Shifts of Phosphorus Probes as Reliable and Practical Acidity Scales for Solid and Liquid Catalysts. *Chem. Rev.* **117**, 12475–12531 (2017).
52. Dubray, F., Moldovan, S., Kouvatas, C., Grand, J., Aquino, C., Barrier, N., Gilson, J.-P., Nesterenko, N., Minoux, D. & Mintova, S. Direct Evidence for Single Molybdenum Atoms Incorporated in the Framework of MFI Zeolite Nanocrystals. *J. Am. Chem. Soc.* **141**, 8689–8693 (2019).
